# Supplementary material
Source: Royal Society of Chemistry journal article supplement (https://www.rsc.org/suppdata/jm/1999/1543/901580i.doc)

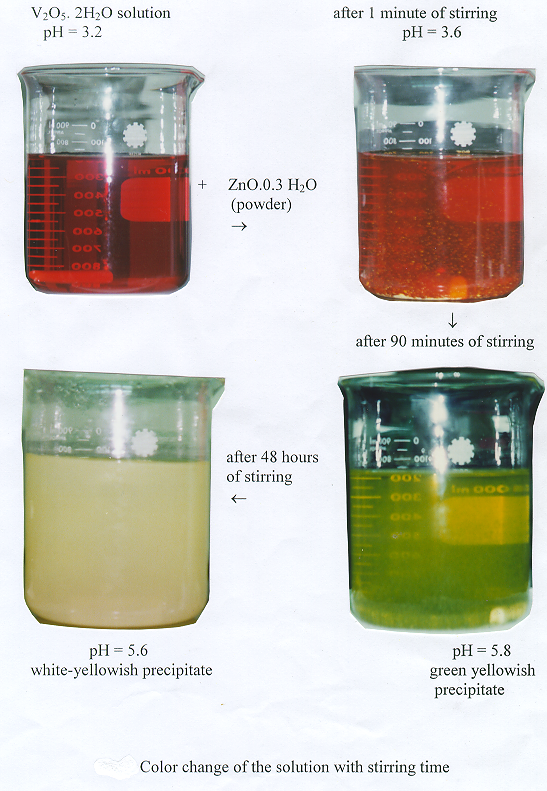

Supplement: Supplementary file 1 [file 901580i.doc]
